# Supplementary material for: Pressure-induced monotonic enhancement of Tc to over 30 K in superconducting Pr0.82Sr0.18NiO2 thin films
Source: Springer Nature journal article supplement (doi:10.1038/s41467-022-32065-x), 2022-07-28
Supplement: 41467_2022_32065_MOESM1_ESM.pdf [file 41467_2022_32065_MOESM1_ESM.pdf]

## Supplementary Information

### Pressure-induced monotonic enhancement of $T_c$ to over 30 K in the superconducting $\text{Pr}_{0.82}\text{Sr}_{0.18}\text{NiO}_2$ thin films

N. N. Wang<sup>1,2\*</sup>, M. W. Yang<sup>1,2\*</sup>, Z. Yang<sup>1,2\*</sup>, K. Y. Chen<sup>1,2</sup>, H. Zhang<sup>1,2</sup>, Q. H. Zhang<sup>1,2</sup>, Z. H. Zhu<sup>1,2</sup>, Y. Uwatoko<sup>3</sup>, L. Gu<sup>1,2</sup>, X. L. Dong<sup>1,2</sup>, J. P. Sun<sup>1,2\*</sup>, K. J. Jin<sup>1,2\*</sup> and J.-G. Cheng<sup>1,2\*</sup>

<sup>1</sup>Beijing National Laboratory for Condensed Matter Physics and Institute of Physics, Chinese Academy of Sciences, Beijing 100190, China

<sup>2</sup>School of Physical Sciences, University of Chinese Academy of Sciences, Beijing 100190, China

<sup>3</sup>Institute for Solid State Physics, University of Tokyo, Kashiwa, Chiba 277-8581, Japan

= These authors contributed equally to this work.

Emails: [jpsun@iphy.ac.cn](mailto:jpsun@iphy.ac.cn); [kjjin@iphy.ac.cn](mailto:kjjin@iphy.ac.cn); [jgcheng@iphy.ac.cn](mailto:jgcheng@iphy.ac.cn)

As displayed below, we can see that the topotactic reduction time (Tr) and the amount of  $\text{CaH}_2$  have strong influence on the superconducting transition of the infinite-layer  $\text{Pr}_{0.82}\text{Sr}_{0.18}\text{NiO}_2$  thin films. In our study, we choose the best samples for high-pressure measurements, i.e. the samples obtained at  $T = 300^\circ\text{C}$ ,  $m(\text{CaH}_2) = 0.21\text{g}$ , and  $\text{Tr} = 60$  mins.

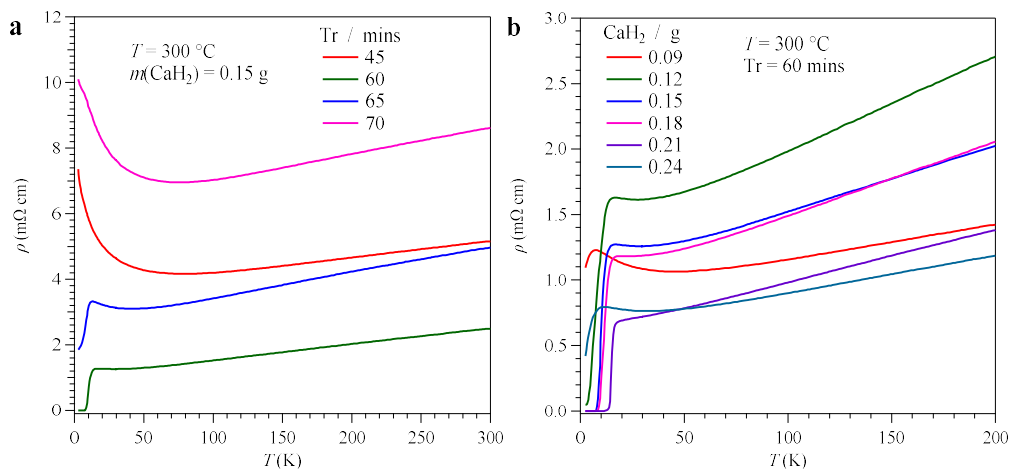

Supplementary Fig. 1 **Temperature dependence of resistivity for the  $\text{Pr}_{0.82}\text{Sr}_{0.18}\text{NiO}_2$  thin films obtained at different conditions. a**  $T = 300^\circ\text{C}$ ,  $m(\text{CaH}_2) = 0.15\text{g}$ , and  $\text{Tr} = 45\text{-}70$  mins; **b**  $T = 300^\circ\text{C}$ ,  $m(\text{CaH}_2) = 0.09\text{-}0.24\text{g}$ , and  $\text{Tr} = 60$  mins.

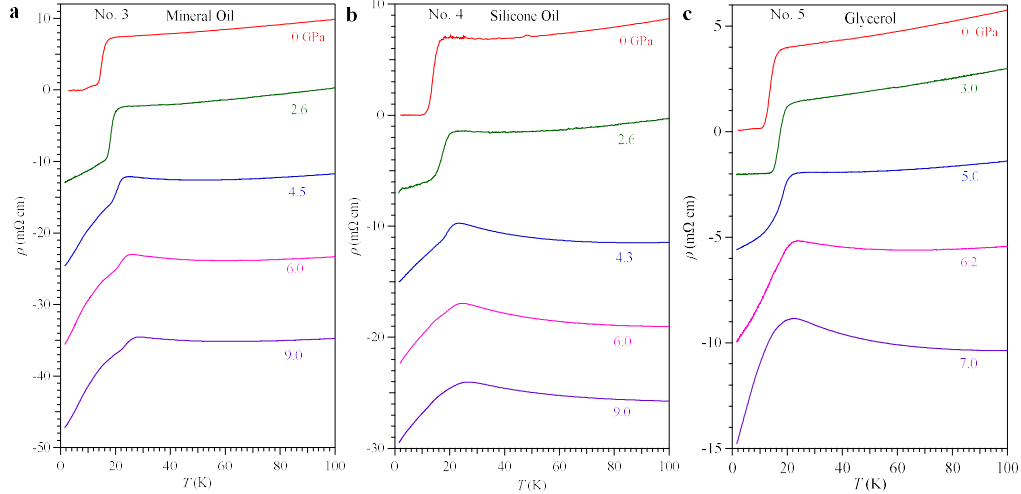

Supplementary Fig. 2 **High-pressure resistivity of  $\text{Pr}_{0.82}\text{Sr}_{0.18}\text{NiO}_2$  thin films.** The resistivity  $\rho(T)$  curves below 100 K **a** for No. 3 with mineral oil, **b** for No. 4 with silicone oil and **c** for No. 5 with glycerol, illustrating the variation of the superconducting transition temperatures with pressure. Except for data at 0 GPa, all other curves in **a**, **b** and **c** have been vertically shifted for clarity.

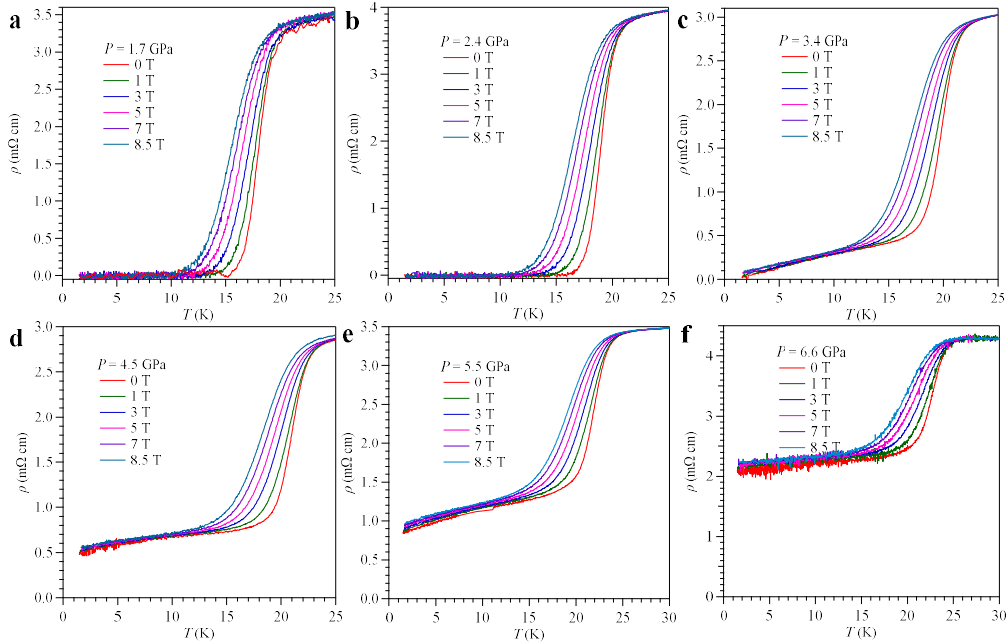

Supplementary Fig. 3 **Evolution of upper critical field of  $\text{Pr}_{0.82}\text{Sr}_{0.18}\text{NiO}_2$  thin films.** Temperature dependences of the resistivity with magnetic fields up to 8.5 T at various pressures up to 6.6 GPa for sample No. 1.

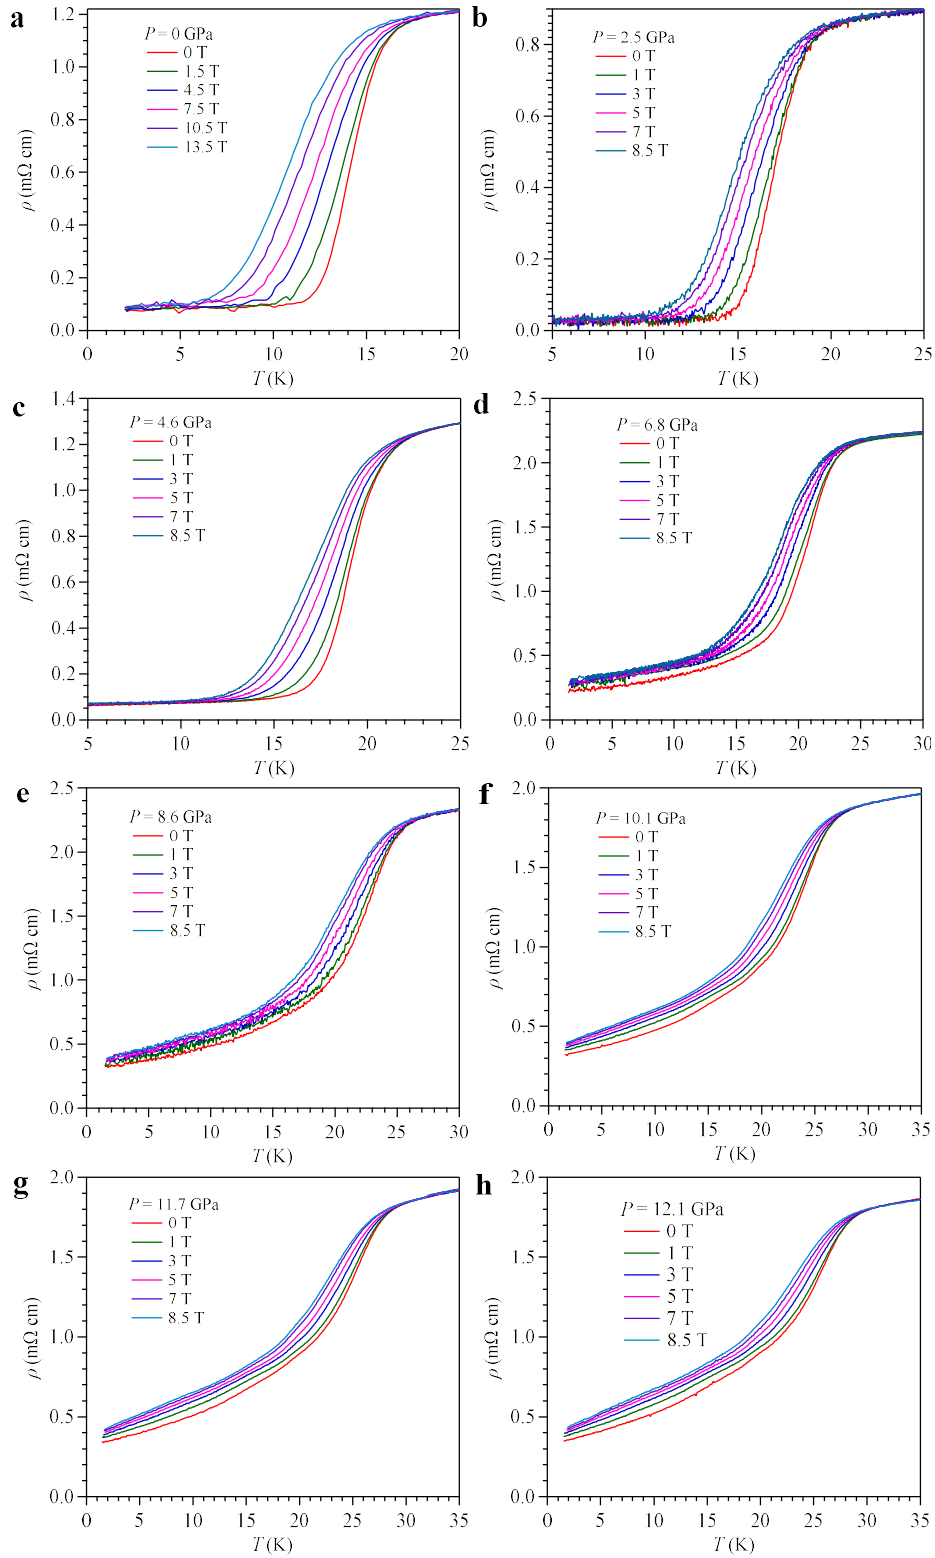

Supplementary Fig. 4 **Evolution of upper critical field of  $\text{Pr}_{0.82}\text{Sr}_{0.18}\text{NiO}_2$  thin films.** Temperature dependences of the resistivity with magnetic fields up to 8.5 T at various pressures up to 12.1 GPa for sample No. 2.

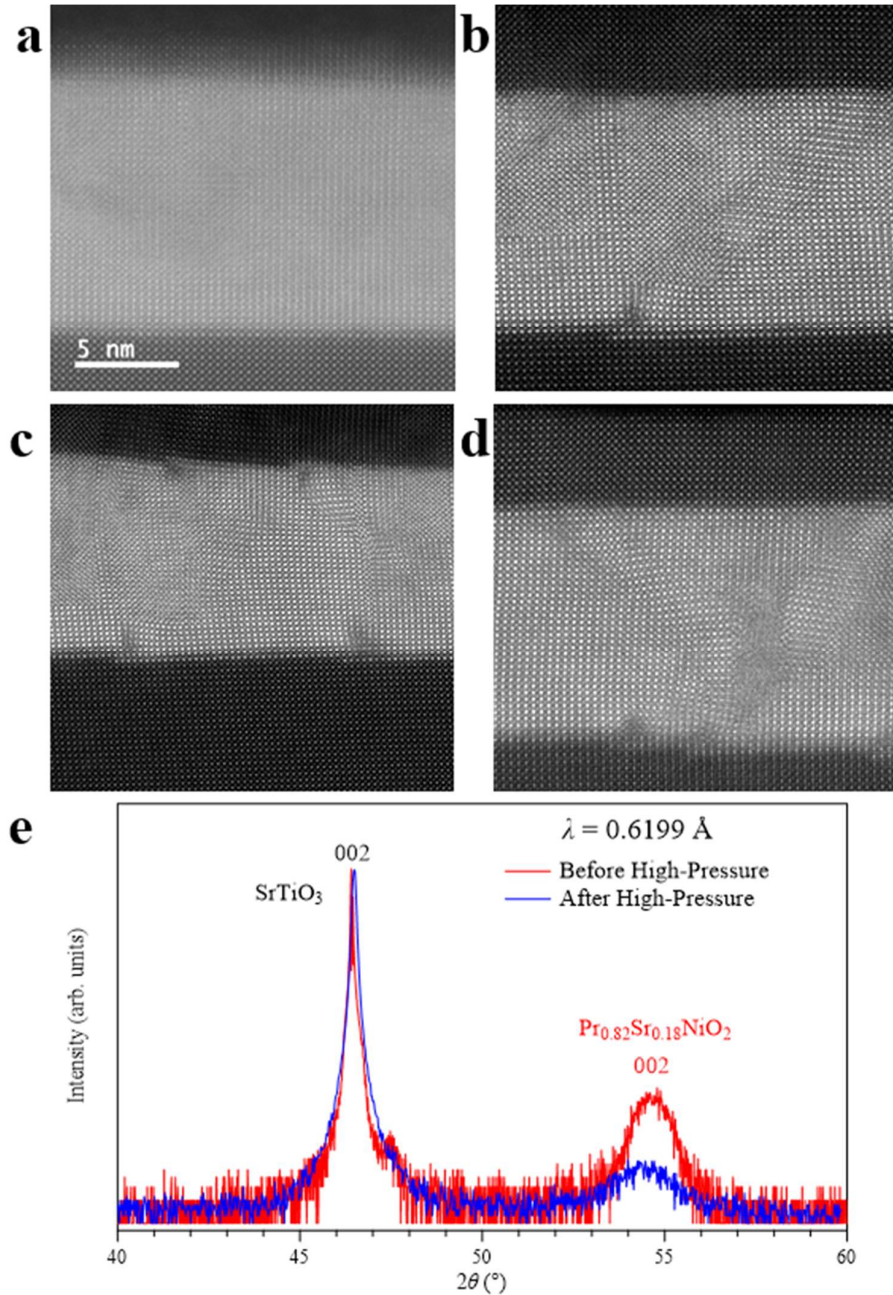

Supplementary Fig. 5 **Characterizations of  $\text{Pr}_{0.82}\text{Sr}_{0.18}\text{NiO}_2$  thin films.** **a** The atomic-resolution STEM imaging of infinite-layer samples **a** before and **b-d** after the high-pressure resistivity measurements. **e** Synchrotron X-ray diffraction  $\theta$ - $2\theta$  symmetric scans of infinite-layer  $\text{Pr}_{0.82}\text{Sr}_{0.18}\text{NiO}_2$  thin film before and after high-pressure measurements with a wavelength of  $\lambda = 0.6199 \text{ \AA}$ .

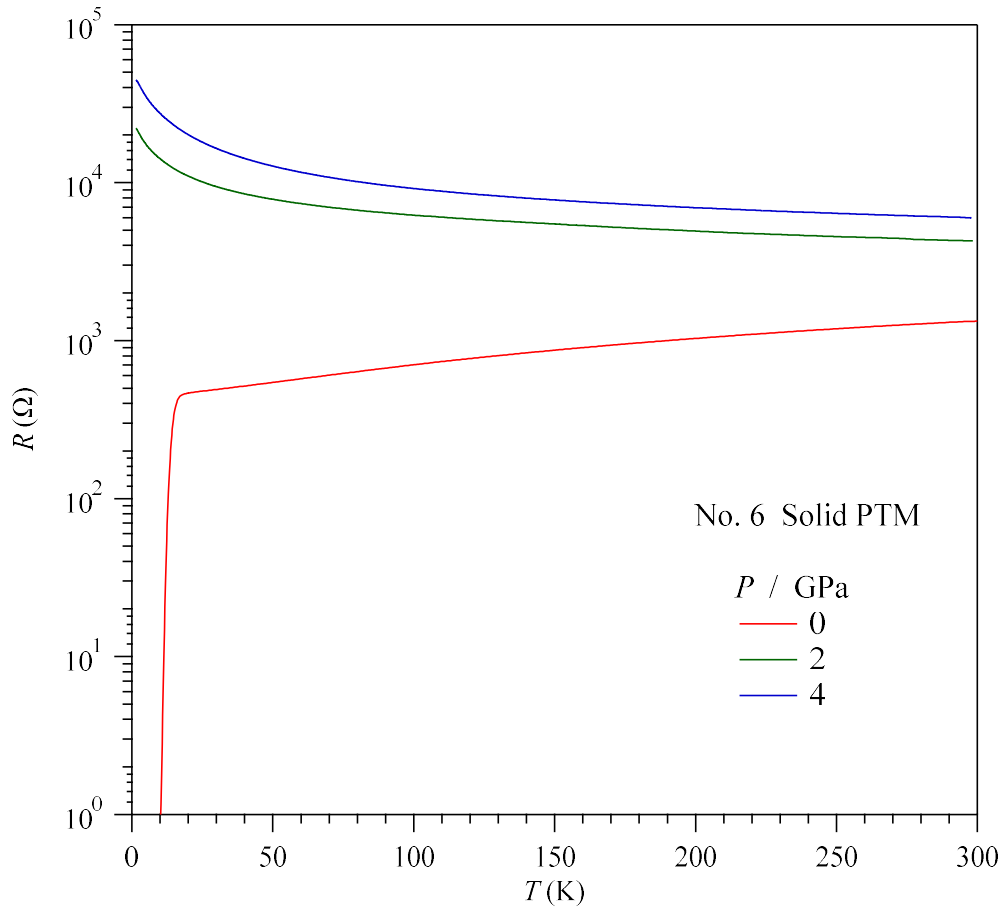

Supplementary Fig. 6 **High-pressure resistivity of  $\text{Pr}_{0.82}\text{Sr}_{0.18}\text{NiO}_2$  thin films.** Temperature dependences of the resistance at 0, 2 and 4 GPa by employing the h-BN solid PTM.
